# Supplementary material
Source: MDPI journal article supplement (https://www.mdpi.com/2073-4441/10/7/945)

Table 1 Parameter estimation for energy model and surface aerator model.

| Model Variables | Parameter | Inner lane | Middel lane | Outer lane |
|-----------------|-----------|------------|-------------|------------|
| Energy          | $a_e$     | 0.27       | 0.35        | 0.83       |
|                 | $\xi$     | 240        | 320         | 330        |
|                 | $R^2$     | 0.99       | 0.95        | 0.99       |
| Aeration, OTR   | a         | 90         | 130         | 110        |
|                 | b         | 0.40       | 0.41        | 0.19       |
|                 | $R^2$     | 0.84       | 0.87        | 0.73       |
| Velocity, $v$   | $v_m$     | 0.70       | 0.69        | 0.95       |
|                 | $K_h$     | 0.09       | 0.05        | 0.34       |
|                 | $R^2$     | 0.97       | 0.98        | 0.99       |

Figure S1 DO profiles along the outer-lane reactor

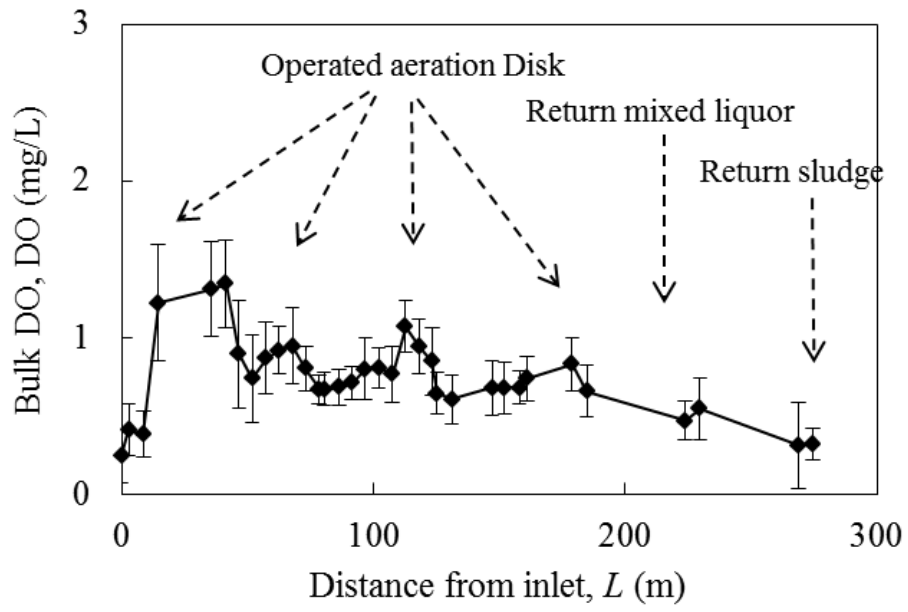

Figure S2 Profiles of OUR and ammonia along the reactor. OL, ML and IL mean the outer, middle and inner lane respectively. OL-1, OL-2 and OL-3 represent the three sampling sites evenly distributed along the OL, Which is the same for ML and IL. Eff represents the sampling site at the effluent weir. Error bars shows the standard deviation of OUR (n=10) and ammonia (n=3).

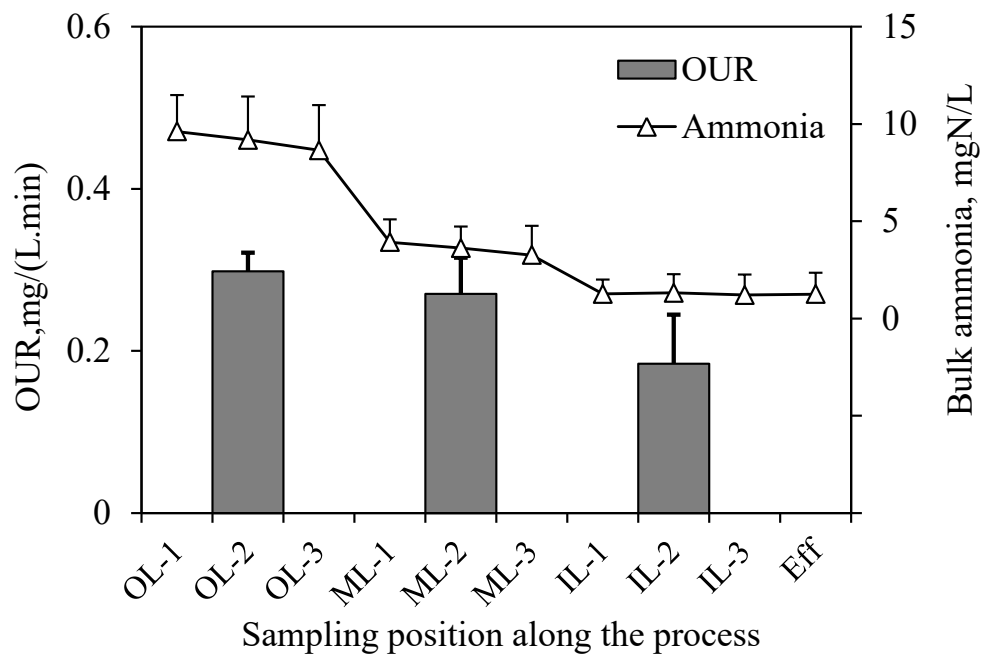

Supplement: s1 [file s1]
